# Supplementary material for: Synthesis of compositionally graded nanocast NiO/NiCo2O4/Co3O4 mesoporous composites with tunable magnetic properties
Source: Royal Society of Chemistry journal article supplement (doi:10.1039/c0jm00406e), 2010-01-01
Supplement: c0jm00406e.pdf [file c0jm00406e.pdf]

*ELECTRONIC SUPPLEMENTARY INFORMATION*

**Synthesis of Compositionally Graded Nanocast NiO/NiCo<sub>2</sub>O<sub>4</sub>/Co<sub>3</sub>O<sub>4</sub>  
Mesoporous Composites with Tunable Magnetic Properties**

**Moisés Cabo, Eva Pellicer, Emma Rossinyol, Marta Estrader, Alberto López-Ortega,  
Josep Nogués, Onofre Castell, Santiago Suriñach and Maria Dolors Baró**

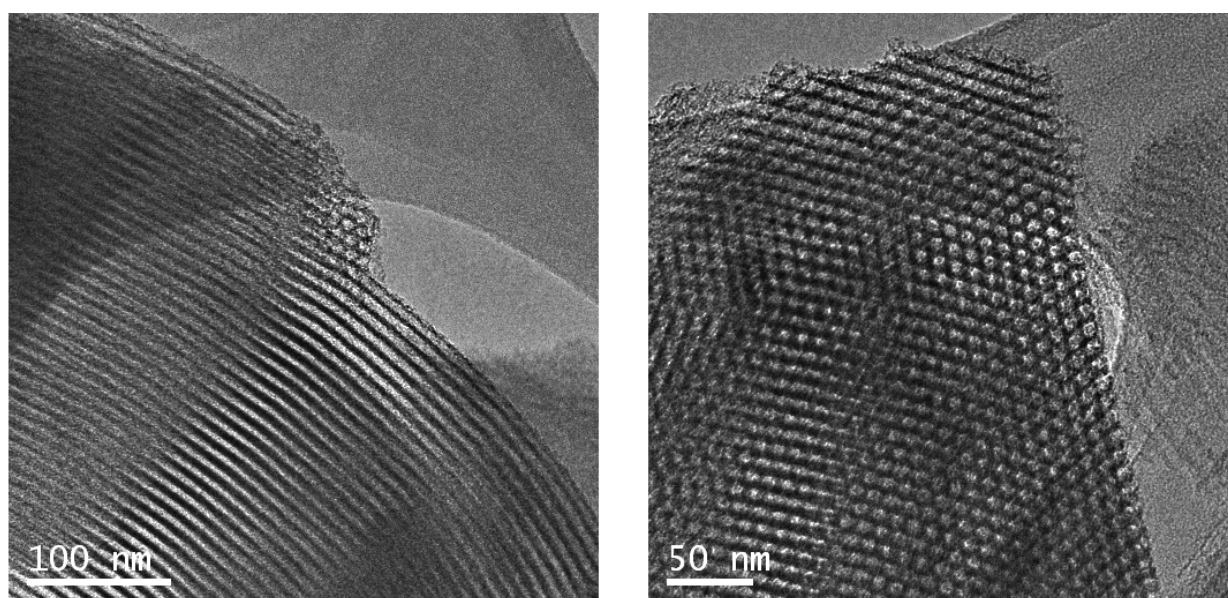

**Fig. S1.** TEM images of the SBA-15 silica template.

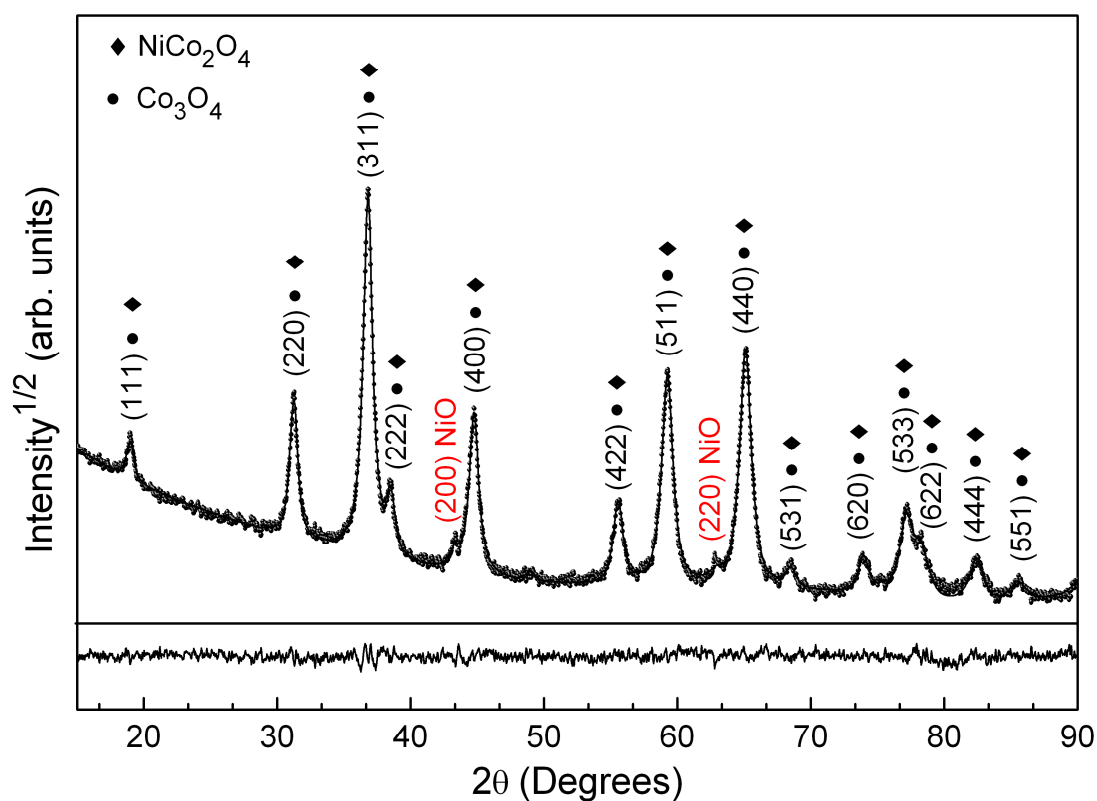

**Fig. S2.** Experimental pattern (●), Rietveld fitting (solid line) and Rietveld difference between the original and computed spectra (at the bottom) of the powder obtained from 0.25:1 Ni(II):Co(II) molar ratio of the metal precursors. The peaks at  $2\theta = 43.4^\circ$  and  $63.0^\circ$  correspond to the (200) and (220) reflections, respectively of the NiO phase (JCPDF 73-1519). Goodness of fitting,  $R_w = 9.27$ .

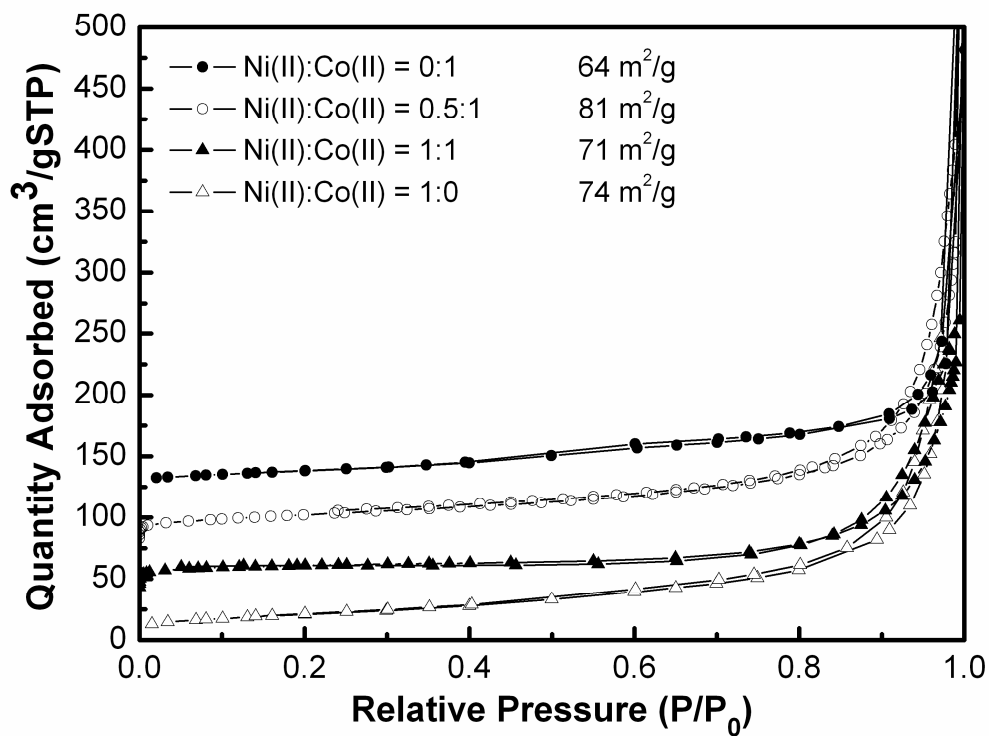

**Fig. S3.** Typical N<sub>2</sub> adsorption-desorption isotherms and corresponding BET areas of the powders obtained from the indicated Ni(II):Co(II) molar ratios.
